For submission to GBE as a Research Article

1  
2  
3  
4  
5  
6  
7  
8  
9  
10  
11  
12  
13  
14  
15  
16  
17  
18  
19  
20  
21  
22  
23  
24  
25  
26

## High-resolution estimates of crossover and noncrossover recombination from a captive baboon colony

Jeffrey D. Wall<sup>\*,1</sup>, Jacqueline A. Robinson<sup>1</sup>, Laura A. Cox<sup>2</sup>

<sup>1</sup>Institute for Human Genetics, University of California San Francisco, San Francisco, USA

<sup>2</sup>Center for Precision Medicine, Department of Internal Medicine, Wake Forest School of Medicine, Winston-Salem, USA

**\*Corresponding author:** E-mail: [jeff.wall@ucsf.edu](mailto:jeff.wall@ucsf.edu)

**Keywords:** Recombination, nonhuman primates, noncrossovers, linkage disequilibrium

### Significance

Most homologous recombination events are noncrossovers (NCO), but little is known about NCO conversion tract lengths. Here we utilize whole-genome sequence data from large baboon pedigrees to estimate the NCO tract length distribution and to study other aspects of recombination.

## 27 **Abstract**

28  
29 Homologous recombination has been extensively studied in humans and a handful of  
30 model organisms. Much less is known about recombination in other species, including  
31 non-human primates. Here we present a study of crossovers and non-crossover (NCO)  
32 recombination in olive baboons (*Papio anubis*) from two pedigrees containing a total of  
33 20 paternal and 17 maternal meioses, and compare these results to linkage-  
34 disequilibrium (LD) based recombination estimates from 36 unrelated olive baboons.  
35 We demonstrate how crossovers, combined with LD-based recombination estimates,  
36 can be used to identify genome assembly errors. We also quantify sex-specific  
37 differences in recombination rates, including elevated male crossover and reduced  
38 female crossover rates near telomeres. Finally, we add to the increasing body of  
39 evidence suggesting that while most NCO recombination tracts in mammals are short  
40 (e.g., < 500 bp), there are a non-negligible fraction of longer (e.g., > 1 Kb) NCO tracts.  
41 We fit a mixture-of-two-geometric distributions model to the NCO tract length distribution  
42 and estimate that >99% of all NCO tracts are very short (mean 24 bp), but the  
43 remaining tracts can be quite long (mean 11 Kb). A single geometric distribution model  
44 for NCO tract lengths is incompatible with the data, suggesting that LD-based methods  
45 for estimating NCO recombination rates that make this assumption may need to be  
46 modified.

## 47 48 **Introduction**

49  
50 Homologous recombination is a fundamental biological process, thought to be  
51 necessary for the proper segregation of chromosomes during meiosis and essential for  
52 the efficacy of natural selection. Recombination rates in higher eukaryotes are  
53 generally measured using (1) genetic comparisons between parents and offspring (e.g.,  
54 using genotype or sequence data), (2) genotyping or sequencing of single or pooled  
55 sperm (i.e., potential gametes), or (3) indirect estimation via statistical methods that  
56 quantify the relationship between linkage disequilibrium and recombination. Each of  
57 these three approaches involve tradeoffs regarding cost/effort and the breadth and

58 depth of information they can provide. In particular, only pedigree-based studies  
59 provide both sex-specific recombination estimates and direct identification of both  
60 crossover (CO) and non-crossover (NCO) recombination events, but they are more  
61 difficult to conduct due to sample acquisition challenges.

62 Recombination is thought to arise from double strand breaks (DSB) that occur  
63 after the pairing of homologous chromosomes during meiosis. Depending on how these  
64 breaks are resolved, the result can either be CO recombination, which involves the  
65 reciprocal transfer of large chromosomal regions between homologs, and NCO  
66 recombination (colloquially called 'gene conversion'), involving the non-reciprocal  
67 replacement of short tracts of DNA from one homolog to another (Orr-Weaver et al.  
68 1981; Szostak et al. 1983). Since crossovers are also associated with gene conversion  
69 tracts at the DSB location, we will use the term NCO recombination to describe  
70 homologous gene conversion not associated with a nearby crossover.

71 Theory predicts a close relationship between recombination and patterns of linkage  
72 disequilibrium (LD), since homologous recombination will tend to shuffle haplotypes and  
73 break down allelic associations. Population genetic analyses of dense genotype and  
74 sequence data, along with sperm typing studies, have shown that most human  
75 crossovers happen in narrow (1-2 Kbp) 'hotspots' (e.g., Chakravarti et al. 1984; Jeffreys  
76 et al. 2001; Crawford et al. 2004; Myers et al. 2005), and that this fine-scale structuring  
77 of recombination rates can help explain the block-like structure of LD in many parts of  
78 the genome (Wall and Pritchard 2003). In most vertebrates, the locations of these  
79 hotspots are mediated by the zinc finger *PRDM9* (reviewed in Paigen and Petkov 2018),  
80 and recombination hotspot locations are generally not shared across closely related  
81 species (e.g., Ptak et al. 2005; Auton et al. 2012; Stevison et al. 2016).

82 Much less is known about NCO recombination. A handful of studies in humans  
83 and model organisms have found that most recombination events are NCOs, but mean  
84 tract lengths are quite short – tens or hundreds of base pairs (e.g., Jeffreys and May  
85 2004; Baudat and de Massy 2007; Cole et al 2010; Comeron et al. 2012; Wijnker et al.  
86 2013; Li et al. 2019). This short tract length makes NCO recombination especially  
87 difficult to study. In particular, for species with low levels of heterozygosity (e.g., most  
88 mammals) many NCO tracts are undetectable because the donor and converted

89 sequences are identical. In most of the remainder only a single heterozygous site is  
90 converted, making NCO recombination difficult to distinguish from simple  
91 genotype/sequencing errors. While statistical methods have been developed for  
92 estimating NCO recombination parameters indirectly from segregating patterns of  
93 genetic variation (e.g., Frisse et al. 2001; Gay et al. 2007; Yin et al. 2009;  
94 Padhukasahasram and Rannala 2013), these methods are not very accurate primarily  
95 because of the small/negligible effect that most NCO tracts have on patterns of genetic  
96 variation. In addition, these methods generally assume that NCO tract lengths follow a  
97 geometric distribution, which may not be biologically realistic. Because of this, studies  
98 of NCO recombination have generally focused on identifying events by comparing the  
99 patterns of genetic inheritance of offspring (or potential offspring in the case of sperm  
100 typing) from their parents (e.g., Jeffreys and May 2004; Comeron et al. 2012; Wijnker et  
101 al. 2013; Williams et al. 2015; Halldorsson et al. 2016; Li et al. 2019).

102       Among mammals, NCO recombination has been most-studied in humans, with  
103 several sperm typing studies (Jeffreys and May 2004; Jeffreys and Neumann 2005;  
104 Webb et al. 2008; Odenthal-Hesse et al. 2014), two large pedigree-based studies  
105 (Williams et al. 2015; Halldorsson et al. 2016), and a study of genetic variation in  
106 autozygous tracts of consanguineous individuals (Narasimhan et al. 2017). Two  
107 observations from these studies stand out. First, both pedigree-based studies found  
108 evidence for complex NCO events, involving multiple non-contiguous gene conversion  
109 tracts that are physically near each other, from the same meiosis, and not associated  
110 with a nearby CO (Williams et al. 2015; Halldorsson et al. 2016). Second, both studies  
111 also found evidence for apparent long (i.e., > 20 Kbp), contiguous NCO tracts. If real,  
112 these long tracts are suggestive of a separate molecular mechanism distinct from the  
113 gene conversion expected under the standard DSB model. It is possible though that  
114 they reflect a rare, CO interference independent recombination process, or that they are  
115 actually complex NCO events with smaller tract sizes that are miscalled due to low  
116 marker density.

117       In this study, we examine patterns of recombination with a focus on NCO tracts  
118 using olive baboons (*Papio anubis*) in the baboon colony housed at the Southwest  
119 National Primate Research Center (SNPRC). We generate and analyze high-coverage

120 whole-genome sequence data from two pedigrees with large sib-ships (Figure 1), which  
121 allows us to estimate sex-specific recombination rates, identify NCO recombination  
122 events, and evaluate the long-range accuracy of the current Panubis1.0 genome  
123 assembly (cf. Batra et al. 2020). This assembly used Hi-C contact data to join contigs  
124 into scaffolds, and the low-resolution linkage map we generate here allows us to assess  
125 the accuracy of this approach.

126 Our choice of baboons was motivated in part by the availability of an extremely  
127 large pedigreed colony at the SNPRC, as well as the higher levels of diversity found in  
128 baboons relative to humans (e.g., Robinson et al. 2019). Our expectation is that the  
129 increased marker density will provide greater resolution on the size distribution of NCO  
130 tracts, and that our study of a nonhuman primate will help elucidate whether some of  
131 the specific recombination patterns observed in humans can be generalized to a wider  
132 group of species.

133

## 134 **Results**

135

### 136 ***Baboon genetic map***

137

138 We identified crossovers and NCO recombination events from a total of 20 paternal and  
139 17 maternal meiosis (Supplementary Table S1). In total, we identified 842 autosomal  
140 crossovers with a median resolution (i.e., the size of the region over which the  
141 crossover location could be placed) of 7.7 Kb. This corresponds to a sex-averaged  
142 autosomal genetic map length of 2,293 cM (2,080 cM in males, 2,506 cM in females).  
143 Our estimate was 16% larger than a previous estimate based on microsatellite data  
144 (Rogers et al. 2000), which reflects both the longer and more complete baboon genome  
145 assembly that we used and the much greater marker density of our study. Overall, our  
146 results are consistent with the growing body of evidence suggesting that old world  
147 monkeys have shorter genetic map lengths, as measured by direct identification of  
148 crossovers in pedigrees, than do humans and great apes (e.g., Broman et al. 1998;  
149 Rogers et al. 2000, 2006; Kong et al. 2002; Jasinska et al. 2007; Venn et al. 2014).

150 We also estimated local recombination rates from patterns of LD in 36 unrelated  
151 olive baboons using pyrho (Spence and Song 2019). We found that rate estimates are  
152 significantly higher within distal regions ( $\leq 10$  Mb from chromosome ends) relative to  
153 proximal regions ( $> 10$  Mb from chromosome ends) (two-sided Mann-Whitney U test,  $p <$   
154  $2.2 * 10^{-16}$ , Supplementary Figure 1).

155

### 156 ***Identifying potential genome assembly errors***

157

158 In performing quality control for our genetic map, we identified several abnormal  
159 apparent crossover patterns that likely reflect errors in the Panubis1.0 genome  
160 assembly (Figure 2). These included a total of 16 potential inversions, 3 misplaced  
161 contigs and 1 potential translocation (Supplementary Table S2). We then used LD-  
162 based estimates of recombination using pyrho (Spence and Song 2019) to examine  
163 whether patterns of LD provided any additional support. On average, estimated  
164 recombination rates at putative synteny breaks are roughly 20 times higher than the  
165 estimated rates in the flanking sequences (Figure 3A), consistent with the decrease in  
166 LD expected across genome assembly error breakpoints. For 6 proposed inversions  
167 and the translocation (Supplementary Table S2), pyrho estimates provide corroborating  
168 evidence in finding low levels of estimated recombination (i.e., evidence for synteny)  
169 across the 'corrected' breakpoints (Figure 3B).

170

### 171 ***NCO recombination***

172

173 After stringent filtering, we identified a total of 325 sites contained in 263 tracts  
174 (Supplementary Table S3) that were inferred to be converted due to NCO  
175 recombination in tracts  $< 10$  Kb in length. Of the 39 events involving the conversion of  
176 more than one heterozygote, the minimal length of the inferred NCO tract was generally  
177 small (median = 42 bp), but had a long tail of occasionally longer tracts (mean = 167 bp,  
178 including 10 tracts longer than 1 Kbp).

179 Overall, we estimated a sex-averaged NCO rate of  $7.52 * 10^{-6}$  per site per  
180 generation (paternal NCO rate =  $5.34 * 10^{-6}$  and maternal NCO rate =  $9.71 * 10^{-6}$ ). As

181 with previous human studies (Williams et al. 2015; Halldorsson et al. 2016), we found a  
182 handful of more complex NCO recombination events, including 7 regions containing  
183 multiple non-contiguous NCO tracts and 9 NCO regions associated with a nearby  
184 crossover (Supplementary Table S3; note that 3 regions involve non-contiguous NCO  
185 tracts that are also associated with a nearby crossover). In addition, we identified 10  
186 regions consistent with a potential NCO tract of length 10 – 100 Kb (Table 1). Of these,  
187 6 were identified as potential inversion errors in the underlying genome assembly, and  
188 three others overlapped with non-inversion potential genome assembly errors  
189 (Supplementary Table S2). If we include the remaining long NCO tract into the rate  
190 calculation, the estimated sex-averaged NCO rate increases to  $8.01 * 10^{-6}$  per site per  
191 generation (paternal NCO rate =  $5.34 * 10^{-6}$  and maternal NCO rate =  $1.07 * 10^{-5}$ ).  
192 These estimates are roughly comparable to NCO rate estimates in humans (e.g.,  
193 Williams et al. 2015; Halldorsson et al. 2016; Narasimhan et al. 2017).

194

### 195 ***GC bias of NCO tracts***

196

197 GC-biased gene conversion (gBGC) is a selectively neutral process whereby gene  
198 conversion events containing an AT/GC heterozygote in the parent are preferentially  
199 resolved to contain the G or C allele in the gamete (Galtier and Duret 2007; Duret and  
200 Galtier 2009). Both sperm typing studies (Odenthal-Hesse et al. 2014) and pedigree-  
201 based studies (Williams et al. 2015; Halldorsson et al. 2016) in humans have quantified  
202 the strength of gBGC in humans. Of the 224 NCO tracts that were informative on gBGC  
203 in our study, 129 of them (57.6%) show a transmission bias toward G or C alleles.  
204 While this proportion is significantly more than 50% ( $p = 0.014$ , one-tailed binomial test),  
205 it is also significantly less than ( $p = 6.8 * 10^{-4}$ , one-tailed binomial test) the 68% GC bias  
206 estimated from human pedigree studies (Williams et al. 2015; Halldorsson et al. 2016).

207

### 208 ***Age vs. recombination rate***

209

210 Previous human recombination studies have documented increases in both CO rate  
211 (Kong et al. 2004; Martin et al. 2015) and NCO rate (Halldorsson et al. 2016) with

212 increasing maternal age. While we are underpowered to detect any true correlations  
213 between recombination rate and parental age, we did find a marginally significant  
214 association between NCO rate and paternal age ( $p = .036$ ; raw data in Supplementary  
215 Table S3). All other comparisons of CO or NCO rate with paternal or maternal age  
216 were not significant ( $p > 0.1$ ).

217

### 218 ***Regional variation in recombination rates***

219

220 We tabulated the relative numbers of CO and NCO recombination events as a function  
221 of distance from telomeres, and stratified the results by sex. We then compared these  
222 with sex-averaged recombination rate estimates based on patterns of linkage  
223 disequilibrium (Figure 4). As with humans, we find that the male / female CO ratio is  
224 higher in distal regions and lower in proximal regions further from the chromosome  
225 ends. Near baboon telomeres, males have significantly higher CO rates *and* females  
226 have significantly lower CO rates (Figure 4A). We observe a significantly higher male  
227 NCO rate near the ends of chromosomes as well (Figure 4B), but did not observe any  
228 correlation between female NCO rate and chromosome ends or between CO rate and  
229 NCO rate. Consistent with a (partial) decoupling of local CO and NCO rates, we find  
230 that rho recombination rate estimates are higher near inferred CO locations (Figure  
231 5A) than near inferred NCO locations (Figure 5B).

232

### 233 ***NCO tract length distribution***

234

235 We used a maximum-likelihood approach for estimating the NCO tract length  
236 distribution from the observed patterns of converted NCO sites. We first assumed a  
237 geometric tract length distribution, similar to previous studies (e.g., Hilliker et al. 1994;  
238 Gay et al. 2007; Miller et al. 2012; Li et al. 2019). If we confine our analyses to NCO  
239 tracts less than 10 Kbp in length, we estimate a mean tract length of 309 bp (95% CI =  
240 290 – 341 bp). However, we found that our estimate was roughly proportional to the  
241 minimum length of the longest NCO tract in our data set. For example, if we only  
242 consider NCO tracts < 5 Kbp in length the estimate is 182 bp (95% CI = 173 – 201 bp),



243 or for tracts < 1 Kbp the mean length estimate is 58 bp (95% CI = 48 – 71 bp). This is in  
244 part because the geometric distribution does not fit the data well. In particular, while  
245 most NCO sites are consistent with a short (i.e., < 100 bp) tract length, there is a tail of  
246 longer NCO tracts that must be kilobases long (Figure 6A).

247 We next considered a more general scenario where NCO tract lengths are  
248 modeled as a mixture of two geometric distributions. This would be appropriate if NCO  
249 recombination could occur through two separate molecular pathways, each of which  
250 produced tracts whose length followed geometric distributions. Our maximum likelihood  
251 estimate had 99.8% of NCO tracts following a distribution with a mean length of 24 bp  
252 (95% CI = 18 – 31 bp), while the remaining NCO tracts had a mean length of 11 Kbp  
253 (95% CI = 3 – 100+ Kbp). Under this best-fit model, just 1.6% of NCO tracts are longer  
254 than 100 bp, but these longer tracts account for 31.6% of all sites that are converted by  
255 NCO recombination (see blue and orange curves in Figure 6B respectively).

256

## 257 **Discussion**

258

259 Pedigree-based studies of recombination, while common in previous decades due to  
260 technological and computational limitations, have been mostly superseded now by  
261 studies that indirectly estimate recombination rates from patterns of linkage  
262 disequilibrium (e.g., Apuli et al. 2020; Beeson et al. 2019; Dreissig et al. 2019; Jones et  
263 al. 2019; Pfeifer 2020; Robinson et al. 2019; Schield et al 2020; Schwarzkopf et al.  
264 2020; Shanfelter et al. 2019; Spence and Song 2019; Xue et al. 2020). We argue  
265 though that despite the substantial amount of time and effort required to conduct  
266 pedigree-based studies, they can provide invaluable information that is inaccessible by  
267 other methods. LD-based recombination estimates, by their nature, are averages  
268 across time and individuals, are influenced by any evolutionary force that affects  
269 patterns of genetic variation (e.g., changes in population size, migration, admixture,  
270 natural selection, etc.), and require assumptions about the effective population size to  
271 be converted into an actual per generation rate. They cannot provide any information  
272 on sex-specific differences in CO rates, nor are they very informative about NCO  
273 recombination. For example, while baboon pyrro estimates are, on average, slightly

274 elevated in sub-telomeric regions, this obscures the observation that male crossovers  
275 are 10-15 times more prevalent than female crossovers in the distal 5 Mbp of each  
276 chromosome arm. Human pedigree studies show the same general pattern (Broman et  
277 al. 1998; Kong et al. 2002), but the sex-bias is much larger in baboons than in humans.

278 One ancillary benefit of our pedigree-based examination of recombination in  
279 baboons is that it helped provide some independent information on the quality of the  
280 existing Panubis1.0 genome assembly. Panubis1.0 utilized a combination of Illumina  
281 short-read, Oxford Nanopore long-read, 10x Genomics linked-read, Bionano optical  
282 map and Hi-C sequence data to create an assembly with N50 contig size of 1.46 Mbp  
283 and single scaffolds that span each of the autosomes (Batra et al. 2020). The Hi-C data  
284 in particular enabled Panubis1.0 to be a truly *de novo* genome assembly, unlike the  
285 previous reference-guided baboon assembly (Rogers et al. 2019). However, there is  
286 some concern that Hi-C based scaffolding is susceptible to incorrect orientation of  
287 contigs, leading to inversion errors in the resulting assembly (e.g., Burton et al. 2013).  
288 Here, traditional linkage analyses enabled us to identify more than 20 likely assembly  
289 errors, most of which were putative inversions (Supplementary Table S3). This  
290 suggests that caution should be taken in accepting Hi-C based scaffolding without the  
291 presence of orthogonal sources of corroborating data.

292 Evidence for an inversion assembly error in linkage data comes from the presence  
293 of three closely spaced crossovers in one or more individuals (Broman et al. 1998,  
294 2003; Figure 2). Six of these cases are also consistent with a single crossover  
295 associated with a long (24 – 86 Kbp), nearby NCO tract. While the data that we have  
296 cannot rule out either of these explanations, the relative dearth of putative long NCO  
297 tracts that are not associated with potential genome assembly errors strongly suggests  
298 that most (if not all) of the apparent long baboon NCO tracts are artefacts and not real.  
299 Similarly, we postulate that at least some of the long human NCO tracts identified in  
300 previous studies (Williams et al. 2015; Halldorsson et al. 2016) are actually due to  
301 microassembly errors or polymorphic structural variants. It is also likely that some of  
302 them represent complex NCO events (with multiple smaller conversion tracts) that are  
303 misclassified due to low marker density.

304 Finally, we note that even after removing all apparent long (e.g., > 10 Kbp) NCO

305 tracts, our data show that a simple geometric model of NCO tract lengths is  
306 inappropriate, at least for baboons. While the mixture-of-two-geometric-distributions  
307 model we considered is somewhat arbitrary, it captures the qualitative observation that  
308 most baboon NCO tracts are quite short, but a small minority can be much longer. The  
309 extent to which our findings reflect general patterns of NCO recombination is unclear at  
310 this time. To date, only two other mammalian species have been studied in depth. Our  
311 results are qualitatively similar to the findings of NCO studies in humans (Williams et al.  
312 2015; Halldorsson et al. 2016), but long NCO tracts seem to be much rarer in studies of  
313 hybrid mice (Li et al. 2019; Gergelits et al. 2021). High-resolution studies in additional  
314 species will be needed to better understand how empirical patterns of recombination  
315 vary across species, and whether additional molecular models (e.g., a crossover  
316 pathway without interference) may be necessary to explain the inferred patterns of  
317 recombination in large pedigrees.

318

## 319 **Materials and Methods**

320

### 321 ***Samples, sequencing and variant calling***

322

323 All samples for this study are putative olive baboons (*Papio anubis*) from the pedigreed  
324 baboon colony housed at the Southwest National Primate Research Center (SNPRC).  
325 We extracted DNA from blood or tissue samples and sent them to MedGenome, Inc. for  
326 sequencing (using standard protocols and libraries) on Illumina HiSeq 4000 and X  
327 machines. We generated novel whole-genome sequence data from 23 individuals,  
328 generated additional sequence data from several previously published baboon  
329 genomes, and combined these with data from previous studies (Robinson et al. 2019;  
330 Wu et al. 2020) to obtain a final data set that included 66 baboons with a median of  
331 35.6X depth of coverage. These samples are included in two large pedigrees (Figure 1)  
332 as well as in a panel of 36 unrelated olive baboons. SRA accession numbers for all  
333 sequences used in this study are presented in Supplementary Table S4 and archived in  
334 NCBI BioProject PRJNA433868.

335 For each sample, we mapped all sequenced reads to the Panubis1.0 genome  
336 assembly (Batra et al. 2020) using BWA MEM (Li and Durbin 2009) before marking  
337 duplicate reads with Picard (<https://broadinstitute.github.io/picard>) and then genotyping  
338 with HaplotypeCaller from the Genome Analysis Toolkit (GATK; McKenna et al., 2010).  
339 We then produced a joint genotype call set with GATK GenotypeGVCFs before applying  
340 filters. Specifically, we excluded sites in soft-masked regions of the genome, which  
341 correspond to repetitive and low complexity regions identified with WindowMasker  
342 (Morgulis et al., 2006), plus variants that were not bi-allelic SNPs. We also excluded  
343 genotypes with genotype quality (GQ) score less than 30, and sites with excess  
344 heterozygosity (defined as sites where the number of heterozygotes more than 3.5  
345 standard deviations above random mating expectations). For the last criterion, we are  
346 aware that the 66 samples are not all unrelated, but since relatedness (and population  
347 structure) generally leads to less heterozygosity than random mating expectations, our  
348 approach is conservative.

349

### 350 ***Pedigree-based identification of crossover events***

351

352 We utilized the single nucleotide variants in the call set described above to identify  
353 recombination events from the meioses involving 10173, 12242, 9841, 1X2816, and  
354 their offspring (20 paternal meioses and 17 maternal meioses in total). Note that each  
355 sub-pedigree had a minimum of 5 offspring.

356 For a target meiosis, we first filtered the data to include only 'informative' sites  
357 where the parentally transmitted allele could be directly inferred. For example, when  
358 trying to identify paternal recombination events in 16517, we require the sire's (10173)  
359 genotype to be heterozygous and the dam's (12242) genotype to be homozygous. That  
360 way, the maternally transmitted allele is known and the paternally transmitted allele  
361 must be the other allele in 16517's genotype. While the parental genome is unphased,  
362 it is straightforward to infer haplotypic phase by examining the patterns of alleles  
363 transmitted by the parent, and to identify potential recombination events by switches in  
364 which haplotype is inherited in each of the offspring (Coop et al. 2008). We employed

365 additional filters by requiring genotype calls in all of a pedigree's offspring, and by  
366 removing the 5 informative sites nearest to the ends of each chromosome.

367 We started by identifying all switches in transmitted haplotype that could be  
368 parsimoniously explained by a single crossover (Supplementary Table S1). We then  
369 manually examined all intervals (i.e., regions between consecutive informative markers)  
370 where we inferred the occurrence of two crossovers. Four of these intervals were long  
371 (e.g., > 60 Kb), not near chromosome ends (i.e., at least 2 Mb away), and involved a  
372 sub-pedigree with at least 7 offspring (i.e., with parent 10173, 1X2816 or 1X4519). For  
373 these, the evidence is quite strong that there were in fact two crossovers (rather than a  
374 genome assembly error or >2 crossovers). An additional eight intervals are shorter (2 –  
375 30 Kb) and/or involve smaller sub-pedigrees with only 5 offspring. We have labelled  
376 these as 'provisional' crossovers, listed them in the "Provisional\_COs" sheet in  
377 Supplementary Table S1, and included them for estimating the total genetic map length.

378

### 379 ***Pedigree-based identification of genome assembly errors***

380

381 We identified several unusual patterns in our crossover data that are suggestive of  
382 either genome assembly errors or polymorphic chromosomal rearrangements (Figure  
383 2). For example, three closely spaced crossovers in a single meiosis are extremely  
384 unlikely due to crossover interference (Muller 1916), but could easily arise through the  
385 combination of a single crossover plus an inversion (Broman et al. 1998, 2003). We  
386 hypothesized that potential breakpoints are likely to occur in-between assembled  
387 contigs, and classified these synteny breaks as putative inversions (three crossovers  
388 within 10 Mb in the same meiosis), misplaced contigs (two closely linked crossovers  
389 occurring at the same locations in multiple individuals), translocations (misplaced  
390 contigs where the correct genomic location could be inferred), or single breaks of  
391 synteny (Supplementary Table S2). The genomic location of contig breaks within  
392 hypothesized breakpoints are shown in parentheses in the second and third columns of  
393 Table S2.

394

### 395 ***LD-based recombination estimates***

396

397 We used pyrho (Spence and Song 2019) to estimate local recombination rates from  
398 patterns of linkage disequilibrium in a panel of 36 unrelated olive baboon founders.  
399 Recombination rate inference with pyrho requires a demographic model, and for this we  
400 used SMC++ (Terhorst et al., 2017). For this analysis, we included genotypes with a  
401 minimum quality score of 40 and read depth  $\geq 8$ , and applied a series of filters based on  
402 recommendations from GATK to minimize the inclusion of errors (QUAL < 30.0, QD <  
403 2.0, FS > 60.0, MQ < 40.0, MQRankSum < -12.5, ReadPosRankSum < -8.0, SOR > 3.0,  
404 ExcHet < 0.05), leaving 14.4 million variants in total. To run SMC++, we used a random  
405 set of ten individuals as the “distinguished” lineages, and set the polarization parameter  
406 (-p) to 0.5 to handle uncertainty in the polarization of derived versus ancestral alleles.  
407 We then followed the developer’s instructions to incorporate the demographic model  
408 from SMC++ into the recombination rate inference with pyrho. We also incorporated two  
409 additional filters before running pyrho; we excluded singletons, which are uninformative  
410 for LD-based recombination rate inference, and we thinned variants so that no two  
411 SNPs were closer than 10 bp, leaving 10.4 million variants in total. To handle the large  
412 number of haplotypes in our dataset (n=72), we enabled the Moran approximation with:  
413 --approx --moran\_pop\_size 98. After exploring a number of block penalty (smoothing)  
414 and window size parameters with hyperparam, we found that a block penalty of 10 and  
415 window size of 75 were optimal. After manual inspection of the output, we removed the  
416 pyrho value for a single interval on chromosome 19 (approximate positions 24.92 –  
417 25.02 Mb) where the estimated genetic map length was ~102 cM. There is no evidence  
418 for any crossovers near this region, so we deemed the extremely large estimate to be  
419 unreliable.

420 pyrho and other LD-based methods most naturally estimate the population scaled  
421 recombination parameter  $\rho$  ( $= 4Nr$ , where  $N$  is the effective population size and  $r$  is the  
422 recombination rate per generation). So, conversion of these values to actual per  
423 generation recombination rate estimates requires assumptions about other fundamental  
424 parameters such as  $N$  and/or the mutation rate. With the assumptions described above,  
425 the pyrho estimated total genetic map length was several times shorter than the sex-  
426 averaged crossover-based genetic map length. To make these results more compatible

427 with each other, we rescaled the pyrho values to have the same total autosomal map  
428 length (2,293 cM) as estimated from crossovers by multiplying all pyrho-based  
429 estimates by the constant 5.577. This preserves local patterns of recombination rate  
430 variability while acknowledging the large uncertainties in estimating past population  
431 sizes.

432

### 433 ***Identifying non-crossover (NCO) recombination***

434

435 NCO recombination can be identified from pedigree data in an analogous way as  
436 crossover identification. Specifically, single NCO tracts show up as two very tightly  
437 linked crossovers in a single individual, or equivalently as one or more closely linked  
438 sites where an offspring inherits one parental haplotype, surrounded on both sides by  
439 much larger regions where the offspring inherits the other parental haplotype. Finally,  
440 we arbitrarily fixed the maximum NCO tract length size as 10 Kb, and analyzed  
441 apparent larger NCO tracts separately (see Results).

442 Pedigree 1 contained three offspring (32043, 32849 and 33863) of the 2nd  
443 generation individuals used for estimating NCO rates (Figure 1). For all sites contained  
444 in putative NCO tracts involving the parents of these offspring (19181 and 19348), we  
445 checked for Mendelian inconsistencies across the whole pedigree as a limited way to  
446 test whether putative NCO tracts might be caused by sequencing/genotyping errors in  
447 the offspring. (We did not find any.) To reduce the effect of potential genotyping errors  
448 in the parent, we excluded sites with more than two segregating alleles, as well as all  
449 apparent NCO tracts that are shared across multiple half or full siblings.

450

### 451 ***NCO tract length distribution***

452

453 We use an approximate maximum-likelihood approach to estimating the probability of  
454 the data as a function of NCO tract length distribution parameters. Here the data  
455 consist of the pattern of which informative sites are converted (or not converted) for  
456 each autosome of each meiosis. We assume that both the probability of NCO  
457 recombination and the NCO tract length distribution do not change across base pairs or

458 meioses, and fix the former at  $7.52 * 10^{-6}$  per base pair per generation, as estimated  
459 below. Without loss of generality, we assume that NCO tracts are initiated at a certain  
460 base pair, and then continue along the chromosome 5' to 3' until they end.

461 Suppose  $D(\Lambda)$  is a specific NCO tract length distribution governed by parameter(s)  
462  $\Lambda$ . If  $m(\Lambda)$  is the mean tract length given  $\Lambda$ , then the per base pair probability of initiation  
463 of an NCO tract of length  $k$  is

$$464 \quad f_k(\Lambda) = \frac{7.52 * 10^{-6} \Pr(k|\Lambda)}{m(\Lambda)}$$

466 per meiosis. For a specific NCO tract, define  $\{o_k\}$  as the number of  $k$ -mers (i.e.,  $k$   
467 consecutive base pairs) that overlap all of the informative sites converted in the tract  
468 and no others. Then the probability of observing an NCO tract is  $\sum_k f_k(\Lambda) o_k$ . Similarly,  
469 define  $\{e_k\}$  as the number of  $k$ -mers (across a chromosome) that must be excluded  
470 because they overlap with a non-converted site. The probability that none of the  
471 informative sites that shouldn't be converted are actually converted is  $\prod_k (1 - f_k(\Lambda))^{e_k} \approx$   
472  $e^{-\sum_k f_k(\Lambda) e_k}$ . Finally, the likelihood of the full data is then the product of the separate  
473 likelihoods of observing each of the observed NCO tracts multiplied by the products of  
474 all of the probabilities of not converting the non-converted sites, across all meioses and  
475 autosomes.

476 Our analyses of actual data treated each contiguous NCO tract as separate, even  
477 if it was part of a complex NCO event, and arbitrarily required tract lengths to be 10 Kbp  
478 or shorter. This led to a total of 263 NCO tracts that we had information for. We first  
479 considered a geometric distribution for NCO tract lengths, requiring the mean length to  
480 be an integer. Confidence intervals were obtained using the standard asymptotic  
481 maximum likelihood assumptions. Next, we considered a mixture of two geometric  
482 distributions, parameterized by  $\Lambda = (\alpha, m_1, m_2)$ , where  $m_1$  and  $m_2$  are the means of the  
483 two distributions, and  $\alpha$  is the proportion of tracts that have mean  $m_1$ . We then  
484 calculated the likelihood of the data over a grid of parameter values, where  $\alpha$  varied  
485 from 0 to 1 in increments of 0.001 and  $m_1$  and  $m_2$  varied from 10 – 100000 for all  
486 integers with 2 significant digits in this range. After obtaining the maximum likelihood  
487 estimate, we created profile likelihood curves for  $m_1$  and  $m_2$  to estimate approximate  
488



489 confidence intervals.

490

## 491 **Data Availability**

492

493 All sequence data used in this study have been deposited in the Sequence Read  
494 Archive under NCBI BioProject PRJNA433868 with accession numbers given in  
495 Supplementary Table S4. The vcf file and pyrho genetic map will be made publicly  
496 available prior to publication.

497

## 498 **Acknowledgments**

499

500 This work was supported by National Institutes of Health grants R24 OD017859 (to  
501 J.D.W. and L.A.C.) and R01 GM115433 (to J.D.W.).

502

503 **Figure Legends**

504

505 **Figure 1.** Schematics of the two baboon pedigrees used in this study.

506

507 **Figure 2.** Detecting assembly errors from abnormal crossover patterns. (A) Type of  
508 assembly error, (B) Pattern of inferred crossovers in offspring, and (C) Description of  
509 pattern.

510

511 **Figure 3.** Estimates of  $\rho$  from patterns of LD at (A) Breaks of synteny in the current  
512 baboon assembly identified from abnormal crossover patterns, and (B) Regions where  
513 the Panubis1.0 assembly has been “corrected”

514

515 **Figure 4.** Recombination rates as a function of distance from telomeres. Comparison  
516 of LD-based recombination estimates (grey and black) with paternal (blue) and maternal  
517 (red) (A) crossover counts, and (B) NCO recombination counts.

518

519 **Figure 5.** Elevation of  $\rho$  recombination rate estimates near the sites of (A)  
520 crossover and (B) NCO recombination events.

521

522 **Figure 6.** Distribution of NCO tract lengths, for actual data and best-fit model. (A)  
523 Minimum inferred lengths of observed NCO tracts shorter than 10 Kbp. (B) Distribution  
524 of NCO tract lengths for the best-fit mixture of two geometric distributions model (in  
525 blue), and weighted by tract length (in orange).

526

527

528 **Table 1.** List of apparent NCO tracts longer than 10 Kbp

529

530

| <b>Chrom.</b> | <b>Parent</b> | <b>Offspring</b> | <b>Minimum tract length</b> | <b># of NCO sites</b> | <b>Overlap with inversion or BOS?</b> |
|---------------|---------------|------------------|-----------------------------|-----------------------|---------------------------------------|
| 3             | 9841          | 19348            | 40934                       | 22                    | No                                    |
| 4             | 9841          | 15444            | 24809                       | 39                    | Yes                                   |
| 6             | 10173         | 18385            | 55304                       | 62                    | Yes                                   |
| 7             | 10173         | 15444            | 39253                       | 2                     | Yes                                   |
| 7             | 12242         | 26988            | 45787                       | 22                    | Yes                                   |
| 8             | 12242         | 28246            | 61766                       | 9                     | Yes                                   |
| 11            | 1X2816        | 10489            | 24481                       | 4                     | Yes                                   |
| 13            | 1X2816        | 8307             | 84614                       | 54                    | Yes                                   |
| 13            | 10173         | 16517            | 86445                       | 48                    | Yes                                   |
| 16            | 12242         | 17903            | 12403                       | 19                    | Yes                                   |

531

## 532 **References**

533

534 Apuli RP, Bernhardsson C, Schiffthaler B, Robinson KM, Jansson S, Street NR,  
535 Ingvarsson PK. 2020. Inferring the genomic landscape of recombination rate  
536 variation in European aspen (*Populus tremula*). *G3 (Bethesda)* 10:299-309.

537 Auton A, Fledel-Alon A, Pfeifer S, Venn O, Segurel L, Street T, Leffler EM, Bowden R,  
538 Aneas I, Broxholme J, et al. 2012. A fine-scale chimpanzee genetic map from  
539 population sequencing. *Science* 336:193-198.

540 Batra SS, Levy-Sakin M, Robinson J, Guillory J, Durinck S, Vilgalys TP, Kwok PY, Cox  
541 LA, Seshagiri S, Song YS, et al. 2020. Accurate assembly of the olive baboon  
542 (*Papio anubis*) using long-read and Hi-C data. *Gigascience* 9:giaa134.

543 Baudat F, de Massy B. 2007. Regulating double-stranded DNA break repair towards  
544 crossover or non-crossover during mammalian meiosis. *Chromosome Res* 15:565-  
545 577.

546 Beeson SK, Mickelson JR, McCue ME. 2019. Exploration of fine-scale recombination  
547 rate variation in the domestic horse. *Genome Res* 29:1744-1752.

548 Broman KW, Murray JC, Sheffield VC, White RL, Weber JL. 1998. Comprehensive  
549 human genetic maps: individual and sex-specific variation in recombination. *Am J*  
550 *Hum Genet.* 63:861-869.

551 Broman KW, Matsumoto N, Giglio S, Martin CL, Roseberry JA, Zuffardi O, Ledbetter  
552 DH, Weber JL. 2003. Common long inversion polymorphism on chromosome 8p. In:  
553 Goldstein DR, editor. *Science and statistics: a festschrift for Terry Speed*. IMS  
554 Lecture Notes-Monograph Series. pp. 237-245.

555 Burton JN, A Adey, Patwardhan RP, Qiu R, Kitzman JO, Shendure J. 2013.  
556 Chromosome-scale scaffolding of de novo genome assemblies based on chromatin  
557 interactions. *Nat Biotechnol* 12:1119-1125.

558 Chakravarti A, Buetow KH, Antonarakis SE, Waber PG, Boehm CD, Kazazian HH.  
559 1984. Nonuniform recombination within the human beta-globin gene cluster. *Am J*  
560 *Hum Genet* 36:1239-1258.

561 Cole F, Keeney S, Jasin M. 2010. Comprehensive, fine-scale dissection of homologous  
562 recombination outcomes at a hot spot in mouse meiosis. *Mol Cell* 39:700-710.

- 563 Comeron JM, Ratnappan R, Bailin S. 2012. The many landscapes of recombination in  
564 *Drosophila melanogaster*. *PLoS Genet* 8:e1002905.
- 565 Coop G, Wen XQ, Ober C, Pritchard JK, Przeworski M. 2008. High-resolution mapping  
566 of crossovers reveals extensive variation in fine-scale recombination patterns among  
567 humans. *Science* 319:1395-1398.
- 568 Crawford DC, Bhangale T, Li N, Hellenthal G, Rieder MJ, Nickerson DA, Stephens M.  
569 2004. Evidence for substantial fine-scale variation in recombination rates across the  
570 human genome. *Nat Genet* 36:700-706.
- 571 Dreissig S, Mascher M, Heckmann S. 2019. Variation in recombination rate is shaped  
572 by domestication and environmental conditions in barley. *Mol Biol Evol* 36:2029-  
573 2039.
- 574 Duret L, Galtier N. 2009. Biased gene conversion and the evolution of mammalian  
575 genomic landscapes. *Annu Rev Genomics Hum Genet.* 10:285-311.
- 576 Frisse L, Hudson RR, Bartoszewicz A, Wall JD, Donfack J, Di Rienzo A. 2001. Gene  
577 conversion and different population histories may explain the contrast between  
578 polymorphism and linkage disequilibrium levels. *Am J Hum Genet* 69:831-843.
- 579 Galtier N, Duret L. 2007. Adaptation or biased gene conversion? Extending the null  
580 hypothesis of molecular evolution. *Trends Genet* 23:273-277.
- 581 Gay J, Myers S, McVean G. 2007. Estimating meiotic gene conversion rates from  
582 population genetic data. *Genetics* 177:881-894.
- 583 Gergelits V, Parvanov E, Simecek P, Forejt J. 2021. Chromosome-wide characterization  
584 of meiotic noncrossovers (gene conversions) in mouse hybrids. *Genetics* 217:1-14.
- 585 Halldorsson BV, Hardarson MT, Kehr B, Styrkarsdottir U, Gylfason A, Thorleifsson G,  
586 Zink F, Jonasdottir Ad, Jonasdottir As, Sulem P, et al. 2016. The rate of meiotic  
587 gene conversion varies by sex and age. *Nat Genet* 48:1377-1384.
- 588 Hilliker AJ, Harauz G, Reaume AG, Gray M, Clark SH, Chovnick A. 1994. Meiotic gene  
589 conversion tract length distribution within the rosy locus of *Drosophila melanogaster*.  
590 *Genetics* 137:1019-1026.
- 591 Jasinska AJ, Service S, Levinson M, Slaten E, Lee O, Sobel E, Fairbanks LA, Bailey  
592 JN, Jorgensen MJ, Breidenthal SE, et al. 2007. A genetic linkage map of the vervet  
593 monkey (*Chlorocebus aethiops sabaeus*). *Mamm Genome* 18:347-360.

- 594   Jeffreys AJ, Kauppi L, Neumann R. 2001. Intensely punctate meiotic recombination in  
595       the class II region of the major histocompatibility complex. *Nat Genet* 29:217-222.
- 596   Jeffreys AJ, May CA. 2004. Intense and highly localized gene conversion activity in  
597       human meiotic crossover hot spots. *Nat Genet* 36:151-156.
- 598   Jeffreys AJ, Neumann R. 2005. Factors influencing recombination frequency and  
599       distribution in a human meiotic crossover hotspot. *Hum Mol Genet* 14:2277-2287.
- 600   Jones JC, Wallberg A, Christmas MJ, Kapheim KM, Webster MT. 2019. Extreme  
601       differences in recombination rate between the genomes of a solitary and a social  
602       bee. *Mol Biol Evol* 36:2277-2291.
- 603   Kong A, Gudbjartsson DF, Sainz J, Jonsdottir GM, Gudjonsson SA, Richardsson B.  
604       2002. A high-resolution recombination map of the human genome. *Nat Genet*.  
605       31:241-247.
- 606   Kong A, Barnard J, Gudbjartsson DF, Thorleifsson G, Jonsdottir G, Sigurdardottir S,  
607       Richardsson B, Jonsdottir D, Thorgeirsson T, Frigge ML, et al. 2004. Recombination  
608       rate and reproductive success in humans. *Nat Genet* 36:1203-1206.
- 609   Li H, Durbin R. 2009. Fast and accurate short read alignment with Burrows-Wheeler  
610       transform. *Bioinformatics* 25:1754-1760.
- 611   Li R, Bitoun E, Altemose N, Davies RW, Davies B, Myers SR. 2019. A high-resolution  
612       map of non-crossover events reveals impacts of genetic diversity on mammalian  
613       meiotic recombination. *Nat Comm* 10:3900.
- 614   Martin HC, Christ R, Hussin JG, O'Connell J, Gordon S, Mbarek H, Hottenga JJ,  
615       McAloney K, Willemsen G, Gasparini P, et al. 2015. Multicohort analysis of the  
616       maternal age effect on recombination. *Nat Commun* 6:7846.
- 617   McKenna A, Hanna M, Banks E, Sivachenko A, Cibulskis K, Kernytsky A, Garimella K,  
618       Altshuler D, Gabriel S, Daly M, et al. 2010. The Genome Analysis Toolkit: a  
619       MapReduce framework for analyzing next-generation DNA sequencing data.  
620       *Genome Res* 20:1297-1303.
- 621   Miller DE, Takeo S, Nandanan K, Paulson A, Gogol MM, Noll AC, Perera AG, Walton  
622       KN, Gilliland WD, Li H, et al. 2012. A whole-chromosome analysis of meiotic  
623       recombination in *Drosophila melanogaster*. *G3 (Bethesda)* 2:249-260.

- 624 Morgulis A, Gertz EM, Schäffer AA, Agarwala R. 2006. WindowMasker: window-based  
625 masker for sequenced genomes. *Bioinformatics* 22:134-141.
- 626 Muller HJ (1916) The mechanism of crossing over. *Am Nat* 50: 193-221.
- 627 Myers S, Bottolo L, Freeman C, McVean G, Donnelly P. 2005. A fine-scale map of  
628 recombination rates and hotspots across the human genome. *Science* 310:321-324.
- 629 Narasimhan VM, Rahbari R, Scally A, Wuster A, Mason D, Xue Y, Wright J, Trembath  
630 RC, Maher ER, van Heel DA, et al. 2017. Estimating the human mutation rate from  
631 autozygous segments reveals population differences in human mutational  
632 processes. *Nat Commun* 8:303.
- 633 Odenthal-Hesse L, Berg IL, Veselis A, Jeffreys AJ, May CA. 2014. Transmission  
634 distortion affecting human noncrossover but not crossover recombination: a hidden  
635 source of meiotic drive. *PLoS Genet* 10:e1004106.
- 636 Orr-Weaver TL, Szostak JW, Rothstein RJ. 1981. Yeast transformation: a model system  
637 for the study of recombination. *Proc Natl Acad Sci USA* 78:6354-6358.
- 638 Padhukasahasram B, Rannala B. 2013. Meiotic gene-conversion rate and tract length  
639 variation in the human genome. *Eur J Hum Genet*  
640 <https://doi.org/10.1038/ejhg.2013.30>.
- 641 Paigen K, Petkov PM. 2018. PRDM9 and its role in genetic recombination. *Trends*  
642 *Genet.* 34:291-300.
- 643 Pfeifer SP. 2020. A fine-scale genetic map for vervet monkeys. *Mol Biol Evol* 37:1855-  
644 1865.
- 645 Ptak SE, Hinds DA, Koehler K, Nickel B, Patil N, Ballinger DG, Przeworski M, Frazer  
646 KA, Pääbo S. 2005. Fine-scale recombination patterns differ between chimpanzees  
647 and humans. *Nat Genet.* 37:429-434.
- 648 Robinson JA, Belsare S, Birnbaum S, Newman DE, Chan J, Glenn JP, Ferguson B, Cox  
649 LA, Wall JD. 2019. Analysis of 100 high-coverage genomes from a pedigreed  
650 captive baboon colony. *Genome Res* 29:848-856.
- 651 Rogers J, Mahaney MC, Witte SM, Nair S, Newman D, Wedel S, Rodriguez LA, Rice  
652 KS, Perelygin A, Slifer M, et al. 2000. A genetic linkage map of the baboon (*Papio*  
653 *hamadryas*) genome based on human microsatellite polymorphisms. *Genomics*  
654 67:237-247.

- 655 Rogers J, Garcia R, Shelledy W, Kaplan J, Arya A, Johnson Z, Bergstrom M,  
656 Novakowski L, Nair P, Vinson A, et al. 2006. An initial genetic linkage map of the  
657 rhesus macaque (*Macaca mulatta*) genome using human microsatellite loci.  
658 *Genomics* 87:30-38.
- 659 Rogers J, Raveendran M, Harris RA, Mailund T, Leppälä K, Athanasiadis G, Schierup  
660 MH, Cheng J, Munch K, Walker JA, et al. 2019. The comparative genomics and  
661 complex population history of *Papio* baboons. *Sci Adv* 5:eaau6947.
- 662 Schield DR, Pasquesi GIM, Perry BW, Adams RH, Nikolakis ZL, Westfall AK, Orton  
663 RW, Meik JM, Mackessy SP, Castoe TA. 2020. Snake recombination landscapes  
664 are concentrated in functional regions despite PRDM9. *Mol Biol Evol* 37:1272-1294.
- 665 Schwarzkopf EJ, Motamayor JC, Cornejo OE. 2020. Genetic differentiation and intrinsic  
666 genomic features explain variation in recombination hotspots among cocoa tree  
667 populations. *BMC Genomics* 21:332.
- 668 Shanfelter AF, Archambeault SL, White MA. 2019. Divergent fine-scale recombination  
669 landscapes between a freshwater and marine population of threespine stickleback  
670 fish. *Genome Biol Evol* 11:1573-1585.
- 671 Spence JP, Song YS. 2019. Inference and analysis of population-specific fine-scale  
672 recombination maps across 26 diverse human populations. *Sci Adv* 5:eaaw9206.
- 673 Stevison LS, Woerner AE, Kidd JM, Kelley JL, Veeramah KR, McManus KF, Great Ape  
674 Genome Project, Bustamante CD, Hammer MF, Wall JD. 2016. The time scale of  
675 recombination rate evolution in great apes. *Mol Biol Evol.* 33:928-945.
- 676 Szostak JW, Orr-Weaver TL, Rothstein RJ, Stahl FW. 1983. The double-strand break  
677 repair model for recombination. *Cell* 33:25-35.
- 678 Terhorst J, Kamm JA, Song YS. 2017. Robust and scalable inference of population  
679 history from hundreds of unphased whole genomes. *Nat Genet* 49:303-309.
- 680 Venn O, Turner I, Mathieson I, de Groot N, Bontrop R, McVean G. 2014. Nonhuman  
681 genetics. Strong male bias drives germline mutation in chimpanzees. *Science*  
682 344:1272-1275.
- 683 Wall JD, Pritchard JK. 2003. Haplotype blocks and linkage disequilibrium in the human  
684 genome. *Nat Rev Genet* 4:587-597.



- 685 Webb AJ, Berg IL, Jeffreys A. 2008. Sperm cross-over activity in regions of the human  
686 genome showing extreme breakdown of marker association. *Proc Natl Acad Sci*  
687 *USA* 105:10471-10476.
- 688 Williams AL, Genovese G, Dyer T, Altemose N, Truax K, Jun G, Patterson N, Myers  
689 SR, Curran JE, Duggirala R, et al. 2015. Non-crossover gene conversions show  
690 strong GC bias and unexpected clustering in humans. *eLife* 4:e04637.
- 691 Wu FL, Strand AI, Cox LA, Ober C, Wall JD, Moorjani P, Przeworski M. 2020. A  
692 comparison of humans and baboons suggests germline mutation rates do not track  
693 cell divisions. *PLoS Biol* 18:e3000838.
- 694 Xue C, Rustagi N, Liu X, Raveendran M, Harris RA, Venkata MG, Rogers J, Yu F. 2019.  
695 Reduced meiotic recombination in rhesus macaques and the origin of the human  
696 recombination landscape. *PLoS One* 15:e0236285.
- 697 Yin J, Jordan MI, Song YS. 2009. Joint estimation of gene conversion rates and mean  
698 conversion tract lengths from population SNP data. *Bioinformatics* 25:i231-i239.  
699

Figure 1

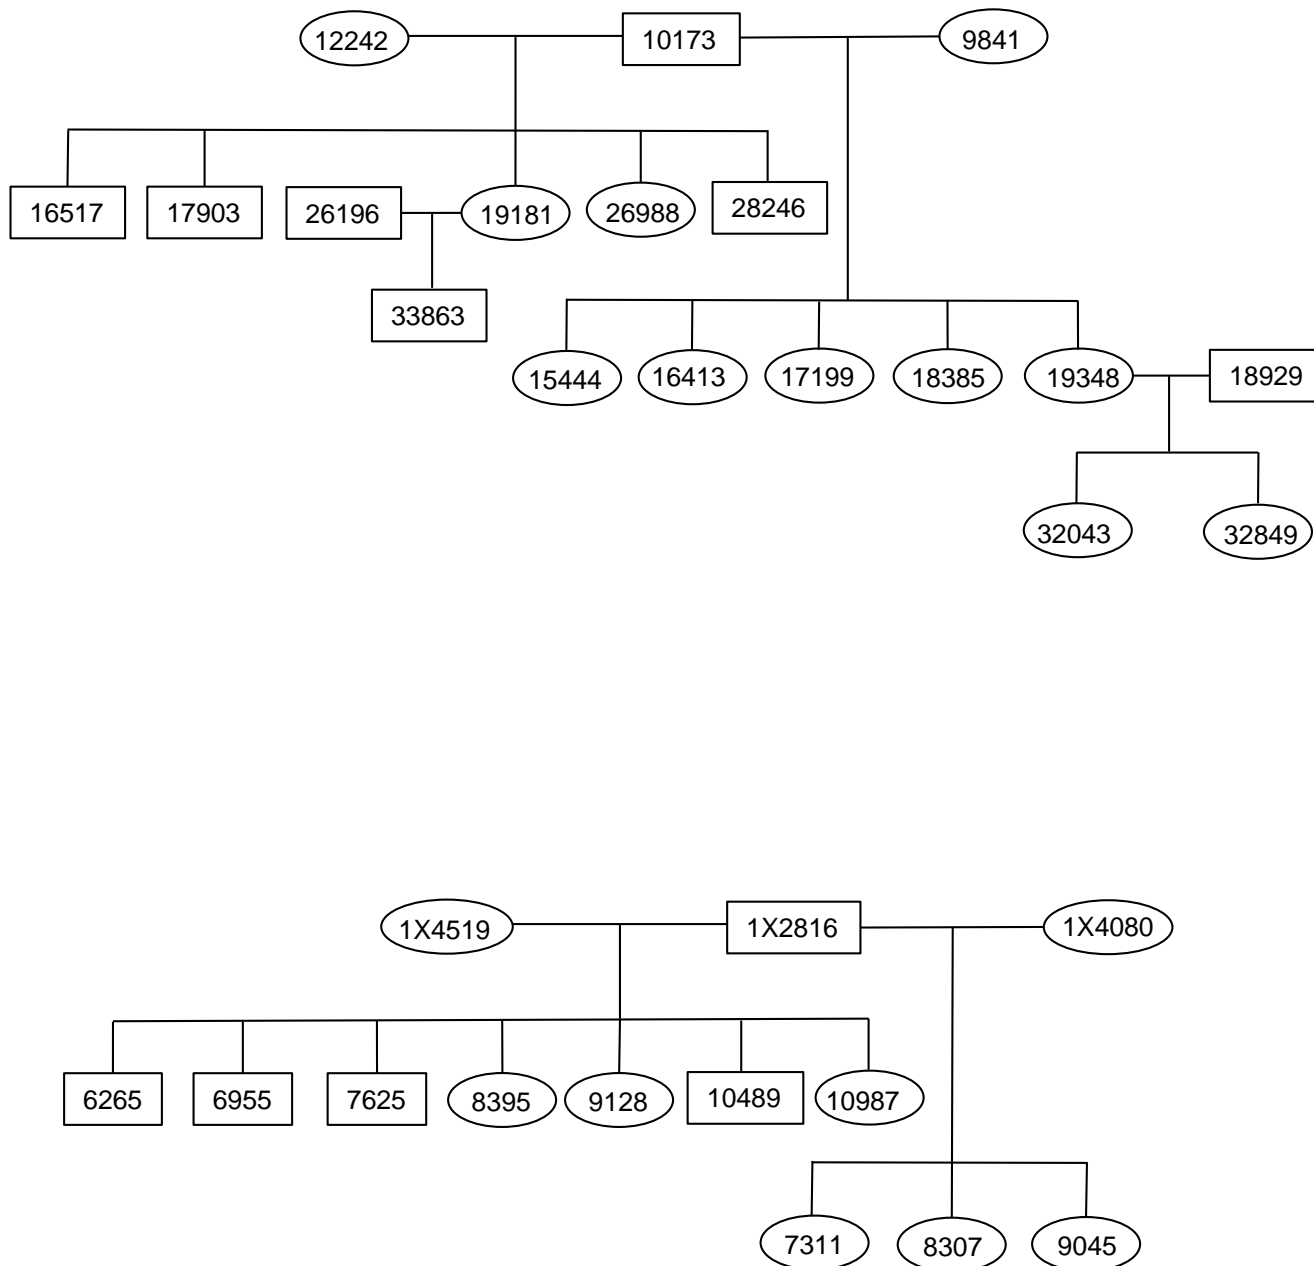

**Figure 2**

**A**

Misplaced contig

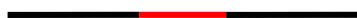

Inversion

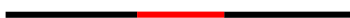

**B**

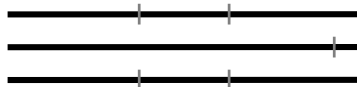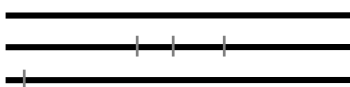

**C**

Closely spaced crossover pairs in multiple individuals

Three closely spaced crossovers in at least one individual

**Figure 3**

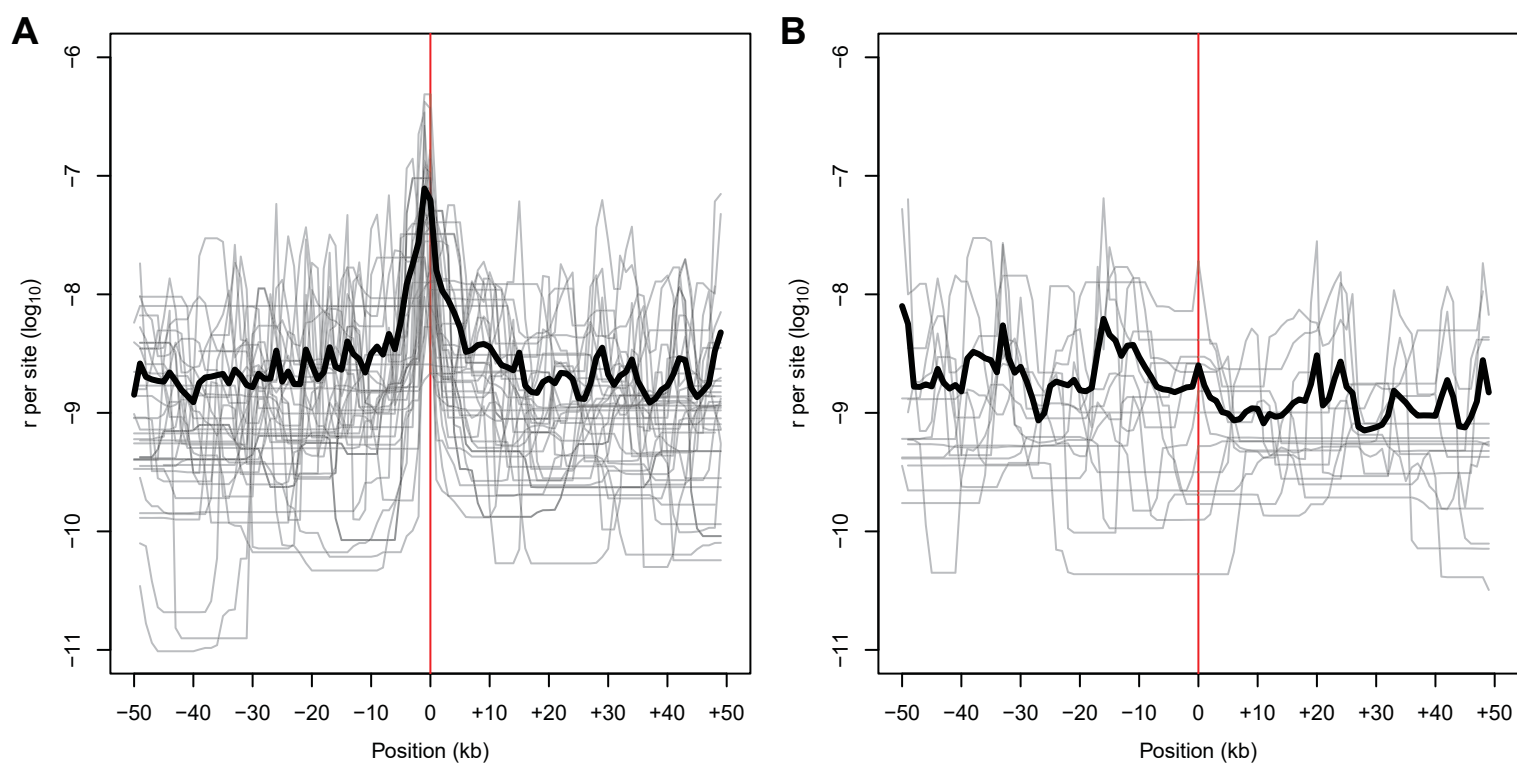

## Figure 4

**A**

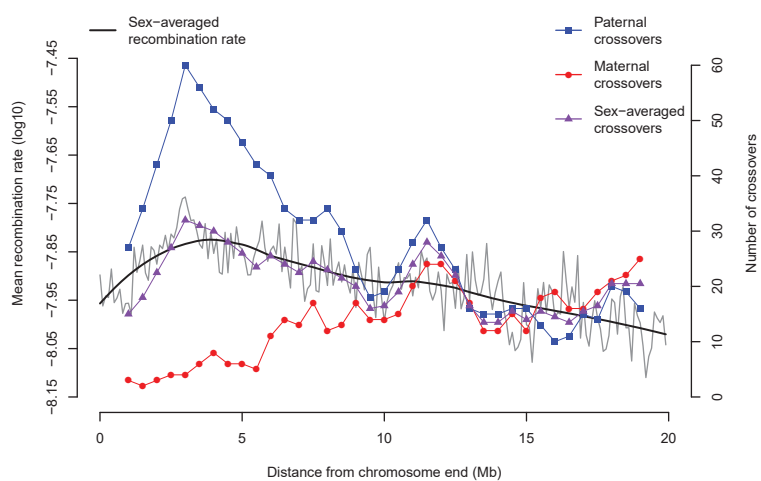

**B**

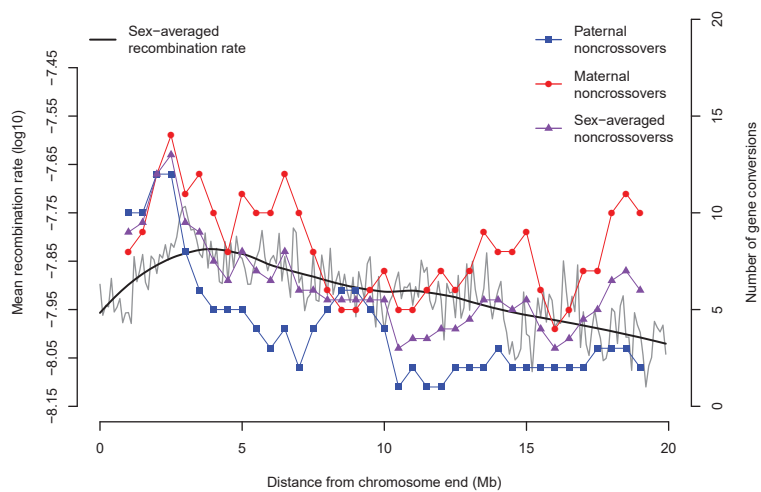

## Figure 5

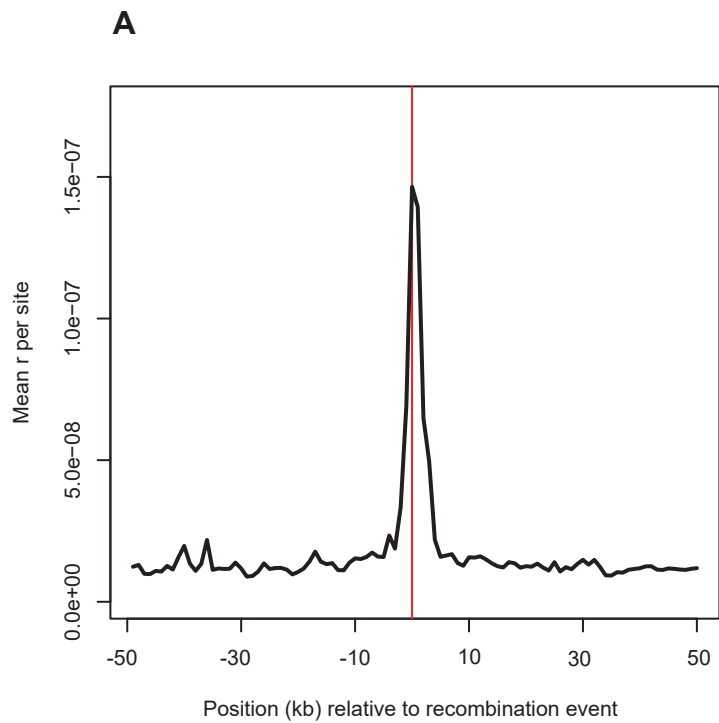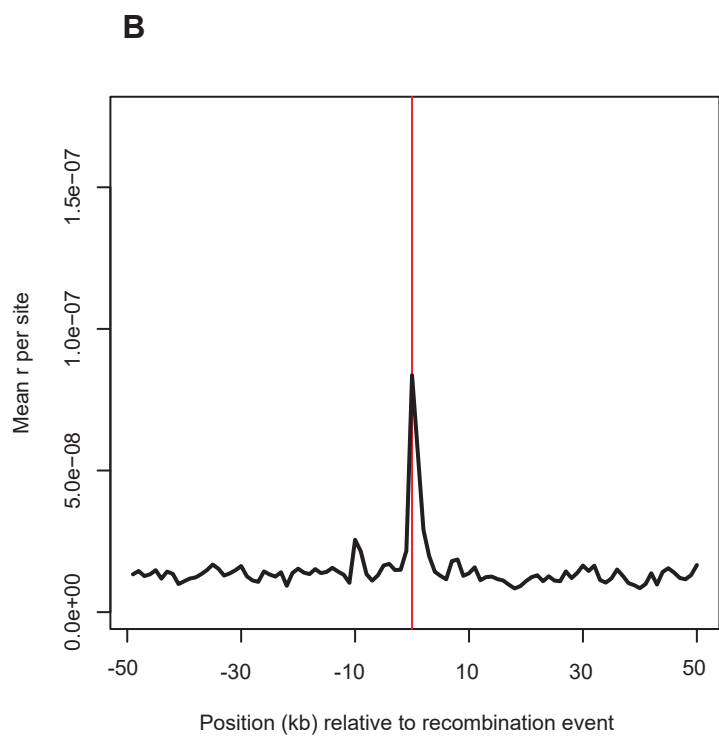

**Figure 6**

**A**

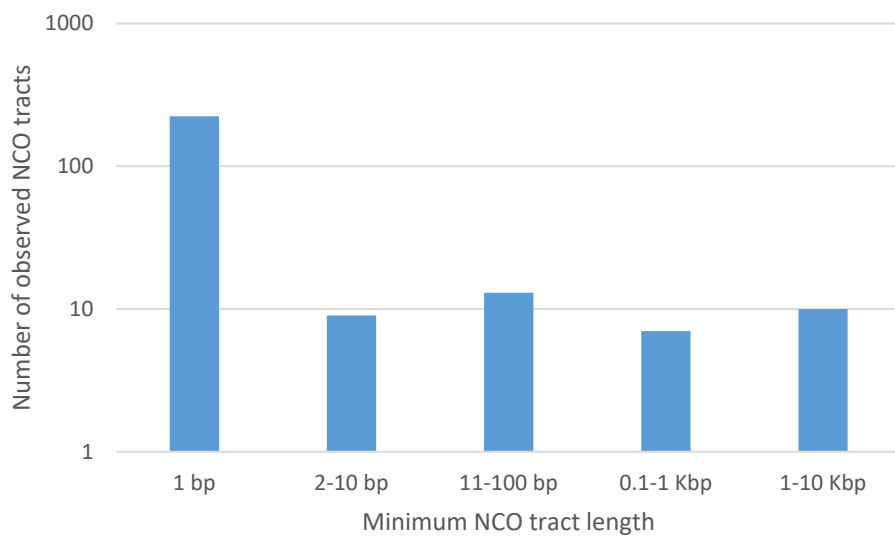

**B**

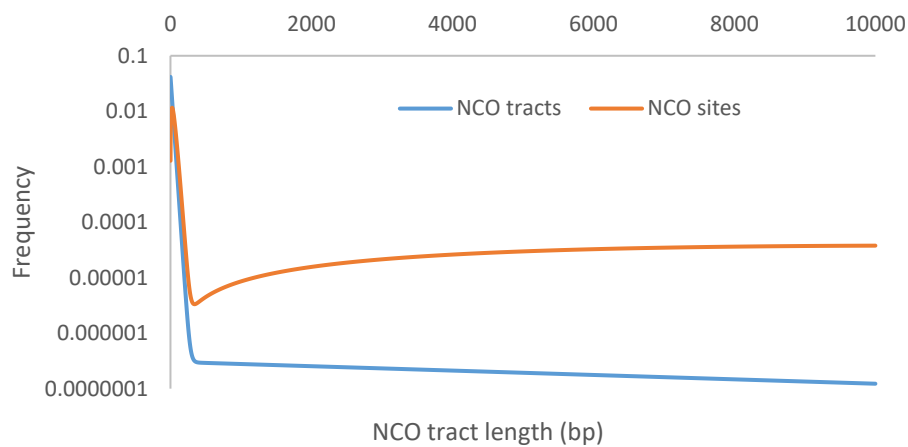

Source: https://www.biorxiv.org/content/biorxiv/early/2021/07/12/2021.07.10.451667.full.pdf
